# Supplementary material for: SOD1 is an essential H2S detoxifying enzyme
Source: PubMed Central journal article supplement — Proc Natl Acad Sci U S A. 2023 Jan 11;120(3):e2205044120. doi: 10.1073/pnas.2205044120 (PMC9934061; doi:10.1073/pnas.2205044120), 2023-01-11
Supplement: pnas.2205044120.sapp.pdf [file pnas.2205044120.sapp.pdf]

## Supplementary Information for SOD1 is an essential H<sub>2</sub>S detoxifying enzyme

Christopher H. Switzer<sup>1\*</sup>, Shingo Kasamatsu<sup>2</sup>, Hideshi Ihara<sup>2</sup> and Philip Eaton<sup>1</sup>

<sup>1</sup>William Harvey Research Institute, Barts and the London School of Medicine and Dentistry, Queen Mary University of London, Charterhouse Square, London, EC1M 6BQ, United Kingdom

<sup>2</sup>Department of Biological Science, Graduate School of Science, Osaka Metropolitan University, Osaka, 599-8531, Japan

\*Christopher H. Switzer

**Email:** [c.switzer@qmul.ac.uk](mailto:c.switzer@qmul.ac.uk)

### **This PDF file includes:**

Supplementary text  
Figures S1 to S5  
Tables S1 to S2  
SI References

## Supplementary Information Text

### MATERIALS AND EXTENDED METHODS

#### Experimental Models and Subject Details

##### Yeast strains

Parental wild type (BY4741) [MATa *his3Δ1 leu2Δ0 met15Δ0 ura3Δ0*] and *sod1Δ* mutant yeast strains were obtained from Horizon Discovery. Yeast strains were cultured at 30°C on YPD agar or liquid media and *sod1Δ* yeast were maintained under selection pressure by adding 200 μg/mL G418 to YPD media.

##### Human cell lines

Human cell lines were obtained from ATCC. Human female embryonic kidney epithelial cell line (HEK293) was cultured in Dulbecco's Modified Eagles Medium (Gibco) supplemented with 10% v/v FBS. Amphotericin B (2.5 μg/mL) and 100U/mL penicillin and 100mg/mL streptomycin were added to media during cell expansion passages. Human female normal breast epithelial cell line (MCF10A) was cultured in Mammary Epithelial Growth Medium (Lonza) supplemented with 100 ng/mL cholera toxin as instructed by ATCC. Cell lines were cultured at 37°C in a 5% CO<sub>2</sub> humidified atmosphere and were detached from culture vessels by incubating cells with trypsin-EDTA diluted to 0.1% w/v with PBS at 37°C and quenched with Defined Trypsin Inhibitor. Cell viability was assessed by trypan blue exclusion assay and quantified with a Countessa II cell counting system (Invitrogen).

##### Plasmids

Wild type and H65R mutant human CBS was cloned into pcDNA3.1(+)-N-eGFP and wild type human SOD1 was cloned into pcDNA3.1+/C-(K)-DYK vectors, expressed in TOP10 E. coli and purified by GenScript Biotech. Plasmids are available via Addgene.

##### Purified protein

Purified human and bovine SOD1 were obtained from Sigma. Human SOD1 was loaded by incubating protein solutions with 100 μM CuSO<sub>4</sub> and ZnCl<sub>2</sub> in 50 mM acetate buffer, pH 4.5 overnight and dialyzing against 50 mM MOPS buffer, pH 7.5 at 4°C. SOD1 copper loading was confirmed by visible spectroscopy and protein concentration determined by BCA assay. Human apo-SOD1 was prepared by dialyzing SOD1 against 50 mM acetate pH 4.5 containing 100 μM EDTA and buffer exchanged into 50 mM MOPS pH 7.5 + 100 μM EDTA. SOD1 activity was confirmed by SOD1 activity assay (Abcam).

#### Method Details

##### Yeast toxicity

Frozen glycerol stocks of yeast were spread onto YPD agar plates and incubated for 24-48 hours at 30°C. Colonies were isolated and grown overnight in YPD at 30°C and with 500 rpm agitation. Yeast were diluted to OD<sub>600</sub> = 0.1 and grown for 6-12 hours to achieve mid-log phase cultures. Yeast were supplemented with Mn by culturing strains as above in YPD containing 4 mM Mn (acetate)<sub>2</sub> (1). For OD<sub>600</sub> growth experiments, yeast strains were then diluted into fresh YPD media, aliquoted into 96-well plates and NaSH added (from freshly prepared 100x stocks prepared in 50 mM Na<sub>2</sub>CO<sub>3</sub>, pH 10). Wells were sealed with an adhesive plate film and inserted into a CLARIOstar Plus set to 30°C and OD<sub>600</sub> was monitored for 12 hours with shaking between readings. For spot assays, mid-log phase cultures were washed and serially diluted in PBS. Freshly poured YPD agar plates were supplemented with 100 μM (final conc.) methyl viologen, NaSH, cysteine trisulfide or potassium polysulfide and 3 μL of yeast suspension were spotted and incubated for 24 hours at 30°C. Plates were imaged on an iBright FL1500 Imaging System and densitometry performed with Gel-Pro Analyzer software (v3.1). To examine persulfide/polysulfide formation in yeast cells exposed to H<sub>2</sub>S, mid-log phase yeast cultures in 5 mL YPD were stained with 3 drops of NucBlue Live (Hoechst 33342) for 30 minutes and cells washed in PBS. Yeast pellets were suspended in

500  $\mu$ L PBS and SSP4 added to a final concentration of 20  $\mu$ M. Yeast were incubated for 1 hour at 30°C and with 500 rpm agitation and yeast were washed again in PBS. SSP4/Hoechst 33342-loaded yeast were re-suspended in 5 mL YPD, diluted 1:20 and added to a white-walled clear bottom 96-well plate. NaSH was added as described above and plates were sealed with an adhesive plate film and inserted into a CLARIOstar Plus set to 30°C. Relative SSP4 (487 $\pm$ 14 nm excitation, dichroic filter 507 nm, 535 $\pm$ 30 nm emission; gain 900) and Hoechst 33342 (360 $\pm$ 20 nm excitation, dichroic filter 407.5 nm, 460 $\pm$ 30 nm emission; gain 900) fluorescence was measured every 15 minutes for 12 hours and compared to YPD alone without yeast (baseline). SSP4 fluorescence was normalized to Hoechst 33342 fluorescence at each time point and plotted versus time.

#### HEK293 cell SOD1-silencing

HEK293 cells were transfected with control or SOD1- or SOD2-specific siRNA (40 nM) using Lipofectamine 3000. After 48 hours, cells were isolated and used as described below and knockdown was confirmed by immunoblotting. For proliferation assays, 20,000 viable cells/100  $\mu$ L DMEM + 10% v/v FBS were seeded into xCELLigence RCTA E-Plate 16 (Agilent, Cat# 5469813001) and GYY4137 added from 100x stock solutions freshly prepared in 1:1 PBS/DMSO mixture. Void space between wells in the E-Plates were filled with 37°C PBS before starting the experiment. E-Plates were then loaded into the xCELLigence RTCA DP analyzer installed in a 37°C incubator with a humidified, 5% CO<sub>2</sub> atmosphere and electrical impedance measured every 15 minutes for 96 hours. All data points were baseline (wells with media only) corrected using RTCA Software Pro. Alternatively, cells were seeded and allowed to grow for 24 hours before addition of GYY4137. To examine endogenous H<sub>2</sub>S production, wild type or mutant (H65R) human CBS expression plasmids were co-transfected with siRNA as above. After 24 hours, NucBlue Live (Hoechst 33342) was added to media and cells were imaged using EVOS M7000 Cell Imaging System. Cells were then diluted and seeded into xCELLigence plates as above and analyzed for protein expression by immunoblotting. For mitochondrial respiration studies, the Seahorse XF96 Cell Mito Stress Test was performed as previously described (2). Briefly, 20,000 HEK293 cells were seeded into Seahorse XF Cell Culture Microplates 48 hours after siRNA transfection and allowed to adhere overnight. NaSH was then added to the wells and the plate assembled with oligomycin, FCCP, rotenone/antimycin A and analysed by Seahorse XF96 Cell Metabolic Analyzer. Oxygen consumption rates were normalized to total protein content determined by BCA assay directly after Seahorse analysis. For protein oxidation assays, cells were seeded into 12-well plates and cultured for 24 hours. To measure protein S-glutathionylation, cells were pre-treated with Glutathione Ethyl Ester, Biotin Amide (BioGEE) (Thermo Fisher Scientific) (150  $\mu$ M final concentration) for 1 hour before addition of NaSH. Cells were incubated with NaSH for 2 hours and lysed in 2X Laemmli Sample Buffer (without 2-mercaptoethanol) supplemented with 50 mM maleimide. Samples were heated to 85°C with 1500 rpm agitation for 10 minutes and analyzed by immunoblotting.

#### HEK293 cell SOD1 overexpression

To examine the effect of SOD1 overexpression, HEK293 cells were transiently transfected with a FLAG-tagged wild type human SOD1 expression plasmid using Lipofectamine 3000 and cultured for 24 hours. Cells were then seeded into xCELLigence plates as above and grown for 48 hours before GYY4137 added and cellular proliferation measured for another 48 hours. The remaining cells were analyzed for protein expression by immunoblotting.

#### Immunoblotting

Cellular samples were measured for relative protein expression levels by immunoblotting. Cell lysates were denatured in 2X Laemmli Sample Buffer containing 5% v/v 2-mercaptoethanol with heating to 85°C with 1500 rpm agitation for 10 minutes. Proteins were then separated by SDS-PAGE using either 10% or 4-20% gradient Mini-PROTEAN TGX precast gels (Bio-Rad) with 25 mM Tris, 192 mM glycine, 0.1% SDS running buffer. Gels were then transferred to PVDF membranes using Trans-Blot Turbo Transfer System (Bio-Rad). Membranes were then blocked with 5% w/v BSA in phosphate-buffered saline containing 0.1% Tween-20 (PBS-Tween) for 1 hour at room temperature and then incubated overnight with diluted primary antibody at 4°C with gentle rotation. Primary antibody dilutions: SOD1 (1:2000),  $\alpha/\beta$ -tubulin (1:3000), PKG1 $\alpha$  (1:1000),  $\beta$ -

actin (1:10,000), biotin (1:1000), GFP (1:1000). Blots were washed in PBS-Tween and incubated with secondary antibody diluted in 5% w/v BSA for 1-2 hours at room temperature with gentle rotation. Secondary antibody dilutions: anti-rabbit-HRP (1:5000), anti-mouse-HRP (1:5000), anti-mouse-Alexa 647 (1:10,000). Membranes were washed and proteins detected by ECL or fluorescent imaging using an iBright FL1500 Imaging System. Densitometry analyses were performed on images using Gel-Pro Analyzer software (v3.1).

#### Liquid chromatography-electrospray ionization–tandem mass spectrometry

Cells ( $1-2 \times 10^6$ ) were homogenized and sonicated in 100  $\mu$ L 50 mM sodium acetate buffer (pH 6.5) containing 1 mM *N*-iodoacetyl L-tyrosine methyl ester (TME-IAM) and 70% methanol. Lysates were incubated at 37°C for 30 min followed by centrifugation at 20,000 g for 15 min at 4°C. The supernatants (100  $\mu$ L) were collected and acidified with 10  $\mu$ L of 10% formic acid (FA), mixed with 100 nM of stable isotope-labeled standards in 0.1% FA/water before liquid chromatography-electrospray ionization–tandem mass spectrometry (LC-ESI-MS/MS) analysis. Insoluble pellets were dissolved in 150  $\mu$ L of phosphate-buffered saline containing 1% sodium dodecyl sulfate and protein content was determined using the bicinchoninic acid assay.

LC-ESI-MS/MS analyses were carried out using a Xevo TQD Triple Quadrupole Mass Spectrometer (Waters, Milford, MA) coupled to a Shimadzu LC-20A system (Shimadzu, Kyoto, Shimadzu) equipped with an autosampler (SIL-20A), a communications bus module (CBM-20A), an on-line degasser (DGU-20A5), two liquid chromatographs (LC-20AD) and a column oven (CTO-20A) as described previously (3) with some modifications. Briefly, cell lysates were evaluated with the Shimadzu LC-20A system on a Mightysil-C18 column (50 mm  $\times$  2.0 mm inner diameter, Kanto Chemical, Tokyo, Japan) and then eluted using methanol as the mobile phase with a linear gradient (1%–99%, 5 min) in the presence of 0.1% FA at a flow rate of 0.3 mL/min at 40°C. The mass spectrometer was operated in the positive mode with the capillary voltage and de-solvation gas (nitrogen) set to 1000 V and 1000 L/h, respectively, at a temperature of 500°C. The respective adducts were detected in the multiple reaction monitoring (MRM) mode using the parameters shown in Table S1.

#### H<sub>2</sub>S measurements

H<sub>2</sub>S amperometric electrodes (ISO-H2S-2, World Precision Instruments) connected to a TBR4100 free radical analyzer (World Precision Instruments) set to 100nA range and coupled to a PowerLab 4SP data acquisition system controlled by LabChart 8 (ADInstruments) were used to measure sulfide in solution. Sulfide consumption experiments were performed in PBS containing 10  $\mu$ M EDTA. A sulfide standard curve was established to correlate H<sub>2</sub>S concentration with the pA output of the electrode. A sulfide stock solution was diluted to 10  $\mu$ M in the reaction vessel containing the electrode with rapid stirring. The signal is allowed to equilibrate for approx. 3-5 minutes before the addition of human SOD1 or MOPS buffer (50 mM, pH 7.5). To measure steady-state H<sub>2</sub>S levels in cell culture media, GYY4137 was diluted into DMEM + 10% v/v FBS and 100  $\mu$ L are added to a 96-well plate and incubated at 37°C for 24 hours. A standard curve was established by adding 100x Na<sub>2</sub>S stock solution to 100  $\mu$ L media in a 96-well plate and the signal plateau was averaged to correlate H<sub>2</sub>S concentration to electrode current. GYY4137 containing media was similarly measured to determine the steady-state H<sub>2</sub>S levels in our *in vitro* assays. To measure H<sub>2</sub>S formed from cysteine trisulfide, 100 mM stock solutions were diluted 1000-fold into 2 mL 500 mM MOPS buffer, pH 7.5 after a stable baseline was established. 2-ME was then added to the rapidly stirring solution at room temperature. Relative cellular H<sub>2</sub>S measurements were measured by adding Difluorinated H<sub>2</sub>S Fluorescent Probe 1 (7-azido-6,8-difluoro-4-methyl-2h-1-benzopyran-2-one; CAS# 2103919-91-9) (Cayman Chemical) to a final concentration of 1  $\mu$ M in media (for HEK293) or PBS (yeast) and incubating for 30 minutes prior to measuring fluorescence (ex. 365/em. 450nm) on a CLARIOstar Plus. Alternatively, after probe loading, cysteine trisulfide was added and incubated 2 hours before fluorescence measurements.

#### Sulfate measurements

Sulfate production from the enzymatic oxidation of sulfide was measured by ion chromatography. All plastic and glassware including pipette tips used in ion chromatography experiments were

washed overnight in 30% v/v trace metal-grade nitric acid, thoroughly rinsed in distilled water and dried before use to remove contaminating sulfate. Human [Cu-Zn]- or apo-SOD1 and NaSH were dissolved in Water For Ion Chromatography (Fisher Scientific, Cat# 12903644) and mixed at room temperature. SOD1 protein was removed from reaction products by Amicon Ultra-0.5 Centrifugal Filter Unit (3 kDa NMWCO). Standards and samples were injected via autosampler into a Thermo Dionex IC 5000+ System with 2 x 50 mm guard and 2 x 250 mm Dionex IonPac anion-exchange analytical columns, a Dionex Anion Dynamically Regenerated Suppressor 600 and quantified with an electrochemical detector.

#### SOD1-catalyzed persulfide formation

Aerobic persulfide formation was examined by mixing human SOD1 (10 or 25  $\mu\text{M}$ ) and SSP4 (100  $\mu\text{M}$ ) in 50 mM MOPS pH 7.5. The reaction was initiated by adding NaSH and the reaction was incubated at 37°C for 30 minutes with 300 rpm agitation and protected from light. Reactions were measured for SSP4 fluorescence (487 $\pm$ 14 nm excitation, dichroic filter 507 nm, 535 $\pm$ 30 nm emission; gain 800) on a CLARIOstar Plus at room temperature. SOD1-sulfide complex and persulfide formation were examined under anaerobic conditions. To study sulfide coordination, the visible spectrum of 100  $\mu\text{M}$  bovine Cu-Zn SOD1 solutions in 50 mM MOPS buffer, pH 7.5 was recorded with a PicoDrop spectrophotometer inside the anaerobic glove box before and after the addition of 50  $\mu\text{M}$  NaSH. The cuvette was removed from the glove box, pipetted up and down 2-3 times to exchange gases and returned to the anaerobic chamber for spectral recording. To examine the mechanism of SOD1-catalyzed persulfide formation, bovine SOD1 and NaSH were reacted in the presence of electron acceptors. All solutions were deoxygenated by multiple cycles of vacuum pumping and nitrogen filling in the small port of an anaerobic glove box maintained below 1 ppm O<sub>2</sub>. To avoid denaturation via bubbling, bovine SOD1 solutions were prepared in the glove box with pre-weighed aliquots. SOD1 (10 or 25  $\mu\text{M}$ ) and either K<sub>3</sub>Fe(CN)<sub>6</sub>, VCl<sub>3</sub> or MV<sup>2+</sup> (1 mM) were mixed in a microcuvette in 50 mM MOPS buffer, pH 7.5. The reaction was initiated by addition of NaSH and the change in absorbance 420 nm was recorded over 3 minutes at 23°C with a PicoDrop spectrophotometer inside the anaerobic glove box. MV<sup>2+</sup> was formed by adding excess dithionite solid to MV<sup>2+</sup> (1 mM in 50 mM MOPS buffer, pH 7.5).

#### Sodium persulfide reactivity

Sodium persulfide (Na<sub>2</sub>S<sub>2</sub>) (Dojindo) was used as supplied and stock solutions were freshly prepared in 10 mM NaOH and immediately further diluted into either MOPS or PBS + EDTA (10  $\mu\text{M}$ ) and added to cells or reactions. Glutathione (GSH) oxidation was measured by reacting GSH (5  $\mu\text{M}$ ) with Na<sub>2</sub>S<sub>2</sub> in 50 mM MOPS buffer, pH 7.5 at 37°C for 30 minutes with 300 rpm agitation. Reaction products were then assayed with GSH-Glo (Promega) as instructed and compared to an authentic GSH standard curve. Adherent MCF10A cells were loaded with BioGEE (150  $\mu\text{M}$  final concentration in culture media for 60 minutes, 37°C) briefly rinsed with PBS and treated with Na<sub>2</sub>S<sub>2</sub> in PBS for 15 minutes. Similarly, adherent HEK293 cells were rinsed with PBS and treated with Na<sub>2</sub>S<sub>2</sub> in PBS for 15 minutes. Cells were then lysed with 2X Laemmli Sample Buffer containing 50 mM maleimide. HEK293 cells (20,000 viable cells/100  $\mu\text{L}$  DMEM + 10% v/v FBS) were seeded into xCELLigence RCTA E-Plate 16 and cell growth was monitored for approx. 24 hours before the addition of Na<sub>2</sub>S<sub>2</sub> diluted into MOPS buffer. Cellular proliferation was monitored for an additional 48 hours.

#### *In vitro* hypoxia

To measure the cellular formation of persulfides under hypoxic conditions, adherent HEK293 cells in black-walled 96-well plates were loaded with SSP4 (20  $\mu\text{M}$  final) and NucBlue (Hoechst 33342) stain for 1 hour. Media was exchanged with DMEM growth media with GYY4137 or vehicle and incubated in either a normal or X incubator with a 5% CO<sub>2</sub>, 1% O<sub>2</sub> humidified atmosphere at 37°C for 24 hours. Relative SSP4 (487 $\pm$ 14 nm excitation, dichroic filter 507 nm, 535 $\pm$ 30 nm emission; gain 900) and Hoechst 33342 (360 $\pm$ 20 nm excitation, dichroic filter 407.5 nm, 460 $\pm$ 30 nm emission; gain 900) fluorescence was measured on a CLARIOstar Plus at 37°C. Overnight yeast cultures were diluted to OD<sub>600</sub> = 0.1 and grown to mid-log phase for 3 hours. SSP4 (40  $\mu\text{M}$  final) was added to the media for the last hour and yeast were washed 3x in PBS before fluorescent measurements.

#### GSSG/GSS<sup>-</sup> equilibrium

Glutathione persulfide formation was measured by reacting GSSG with sulfide. Na<sub>2</sub>S stock solutions prepared in 10 mM NaOH were diluted into 500 mM MOPS buffer, pH 7.5 and immediately added to oxidized glutathione (GSSG) (1 mM) in 50 mM MOPS buffer, pH 7.5. Reactions were agitated at 300 rpm for 15 minutes at 37°C and UV-visible spectra recorded in a quartz microcuvette on a Picodrop spectrophotometer. To measure the effect of SOD1 on HS<sup>-</sup>/GSS<sup>-</sup> equilibrium, GSSG (10mM) was mixed with NaSH (100 μM) in 50 mM MOPS buffer, pH 7.5 and added to a quartz microcuvette. Bovine SOD1 (100 μM final) or MOPS buffer were added to the glutathione/sulfide mixture and Abs 340 nm measured every 2 seconds. GSS<sup>-</sup> concentration converted from absorbance values with Beer's law using  $\epsilon = 19,800 \text{ M}^{-1} \text{ cm}^{-1}$  (4).

#### Potassium superoxide reactions

KO<sub>2</sub> (100 mM in 10 mM NaOH) stock solutions were freshly prepared and immediately used. KO<sub>2</sub> was reacted with Na<sub>2</sub>S solutions (also freshly prepared in 10 mM NaOH) in 500 mM MOPS buffer, pH 7.5 for 30 minutes at room temperature. mBBr was added to a final concentration of 1 mM and incubated at room temperature for 15 minutes protected from light. Relative fluorescence recorded on a CLARIOstar Plus at room temperature. Alternatively, CBA (1 mM final) or SSP4 (200 μM final) was added to reaction buffer and fluorescence measured on a CLARIOstar Plus. Polysulfide formation was monitored at room temperature over time at 300 nm. Na<sub>2</sub>S (50 mM, final) was added to a quartz microcuvette, and the reaction was initiated by adding 5 mM (final) KO<sub>2</sub>.

#### Cellular ROS production

HEK293 cells (20,000 in 100 μL media) were seeded into black-walled, clear bottomed 96-well plates and cultured overnight. Cells were then loaded with MitoSOX Red (50 μM for 30 minutes), washed gently with media and rotenone (100 nM final) or DMSO vehicle was added to the media and then NaSH added (500 μM final) and cells were incubated at 37°C for 2 hours. Before fluorescent measurements, NucBlue (Hoechst 33342) was carefully added to the media and incubated a further 10 minutes at 37°C. Fluorescence (MitoSOX:510/580nm and Hoechst 33342: 360/460nm) was measured on a CLARIOstar Plus at room temperature and RFU ratios calculated and plotted. In parallel experiments, cells were treated with rotenone and NaSH as above and incubated 24 hours at 37°C. Cell viability was then measured using CellTiter 96® AQueous One Solution Cell Proliferation Assay (MTS) (Promega) as instructed.

#### Statistical Analysis

Data are shown as mean ± SEM unless otherwise indicated in figure legends. The number of biological replicates for cellular experiments is expressed as n in the figure legends and each replicate is the mean value of technical replicates as indicated. The number of replicates for chemical and biochemical experiments is expressed as n in the figure legends. Statistical analyses were conducted using Graph Pad Prism9 software. Yeast growth curve data (Figure 1C) was smoothed by averaging 8 data points on either side using a second-order polynomial and raw data were fit to log growth curve using MARS Data Analysis Software (BMG LABTECH) and calculated sloped were calculated by four-parameter logistic curve. SOD1-Cu<sup>2+</sup> reduction was fit to a first order decay curve and calculated goodness of fit. Significance was assessed using an unpaired, two-tailed t test or by one- or two-way ANOVA with Dunnett or Sidak multiple test correction. Statistical significance was determined by  $p < 0.05$ .

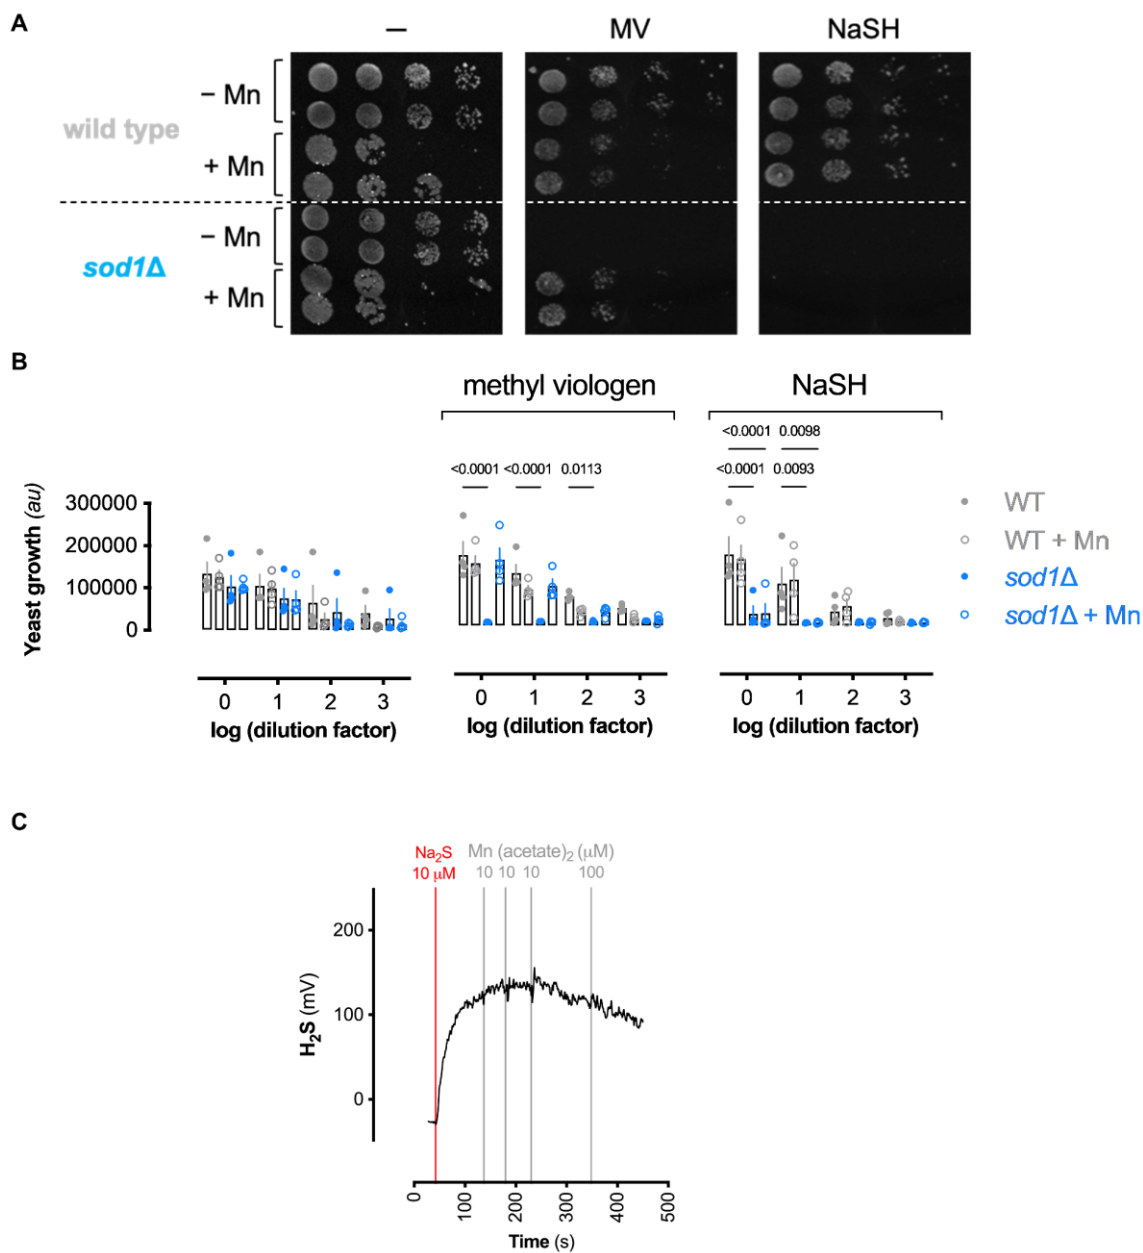

**Fig. S1. Oxidative stress does not mediate sulfide-induced cytotoxicity in *sod1Δ* yeast.**

(A) Representative image of yeast spot assay of wild type or *sod1Δ* yeast cultured with or without manganese diacetate (4 mM) and grown on YPD agar media or YPD containing either 100  $\mu$ M  $MV^{2+}$  or NaSH. (B) Bar graph showing mean values from densitometric analysis of yeast spot assay images ( $\pm$ SEM; n=4 experiments, n=2 spots per experiment). Significance calculated by two-way ANOVA with Sidak's test. (C) Amperometric measurement of  $H_2S$  (10  $\mu$ M) in the presence of  $Mn$  (acetate) $_2$ , indicating that  $Mn^{2+}$  does not accelerate sulfide decay.

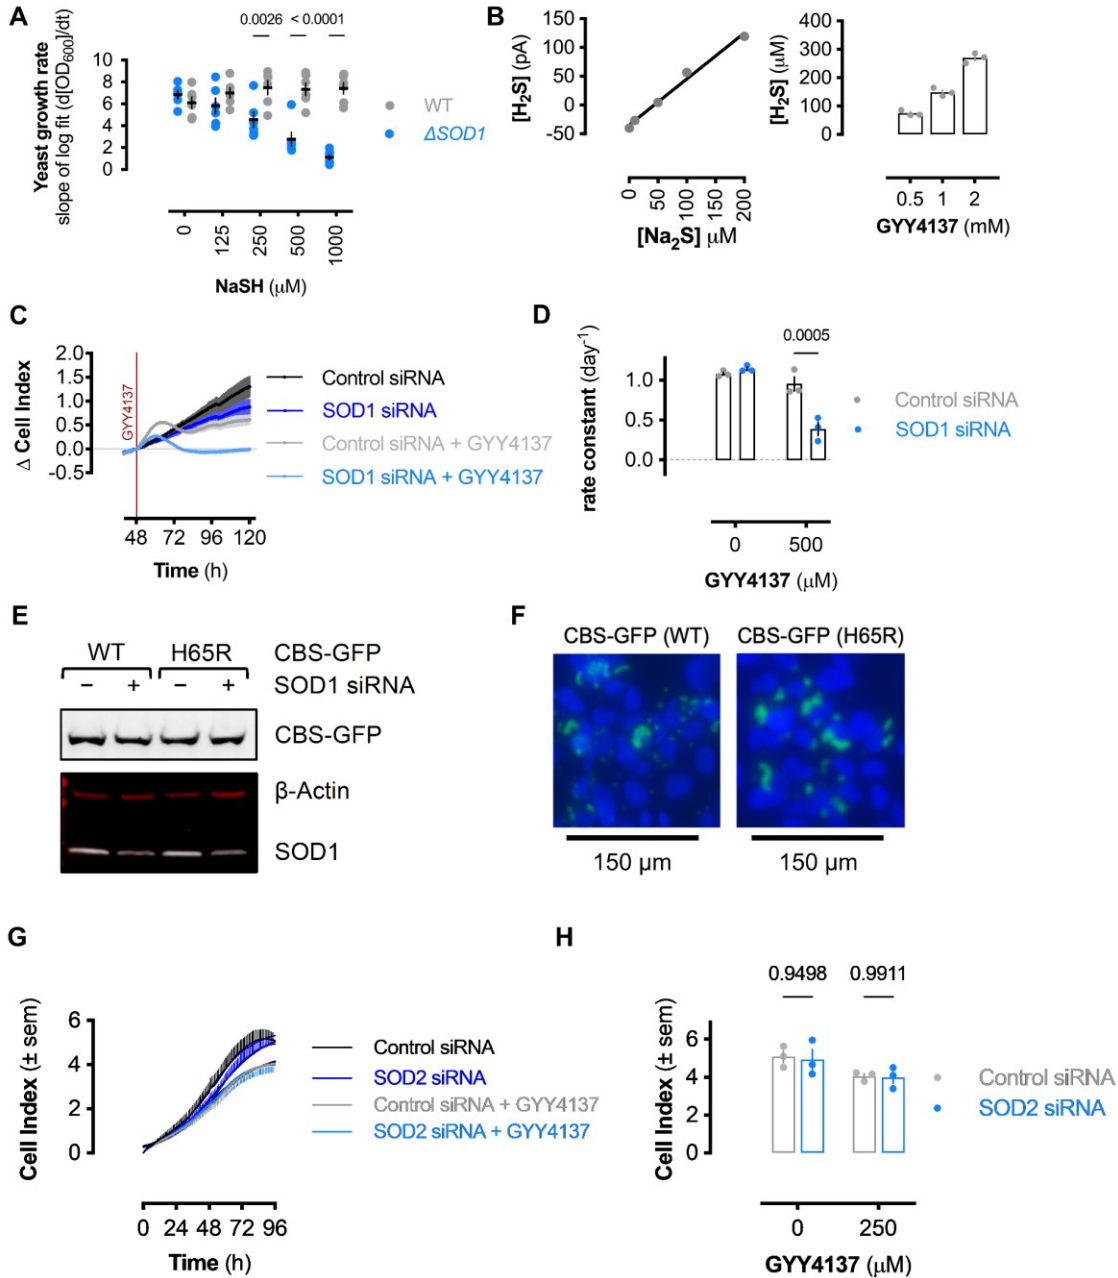

**Fig. S2. SOD1 expression protects cells from H<sub>2</sub>S toxicity.**

(A) Yeast growth rates calculated from Figure 1B plotted against NaSH concentration. Horizontal lines represent mean rates ( $\pm$ SEM;  $n=6$  experiments,  $n=3-6$  wells per experiment). (B) (left) H<sub>2</sub>S amperometric electrode standard curve generated from Na<sub>2</sub>S stock solutions diluted into PBS at 25°C. (right) Steady-state H<sub>2</sub>S concentrations in DMEM media released from GYY4137 after 24 hours at 37°C. Bars represent mean concentrations ( $\pm$ SEM;  $n=3$  wells). (C) Representative cellular proliferation of adherent control or SOD1-silenced HEK293 treated with GYY4137 (500 μM) at the indicated time point. (D) Growth rate constants calculated from (C). Bars represent mean rate constants ( $\pm$ SEM;  $n=3$  experiments,  $n=3-4$  wells per replicate). (E) Immunoblot showing relative CBS and SOD1 expression in HEK293 cells. (F) Fluorescent images of wild type or mutant CBS-GFP expressing HEK293 cells. Images recorded at 20x magnification and scale bar represents 150 μm. (G) Representative cellular proliferation of control or SOD2-silenced HEK293 treated with



GY4137 (500  $\mu\text{M}$ ). Data shown are mean values ( $\pm\text{sd}$ ;  $n=3-4$  wells). **(H)** Growth rate constants calculated from (G). Bars represent mean rate constants ( $\pm\text{SEM}$ ;  $n=3$  experiments,  $n=3-4$  wells per replicate).

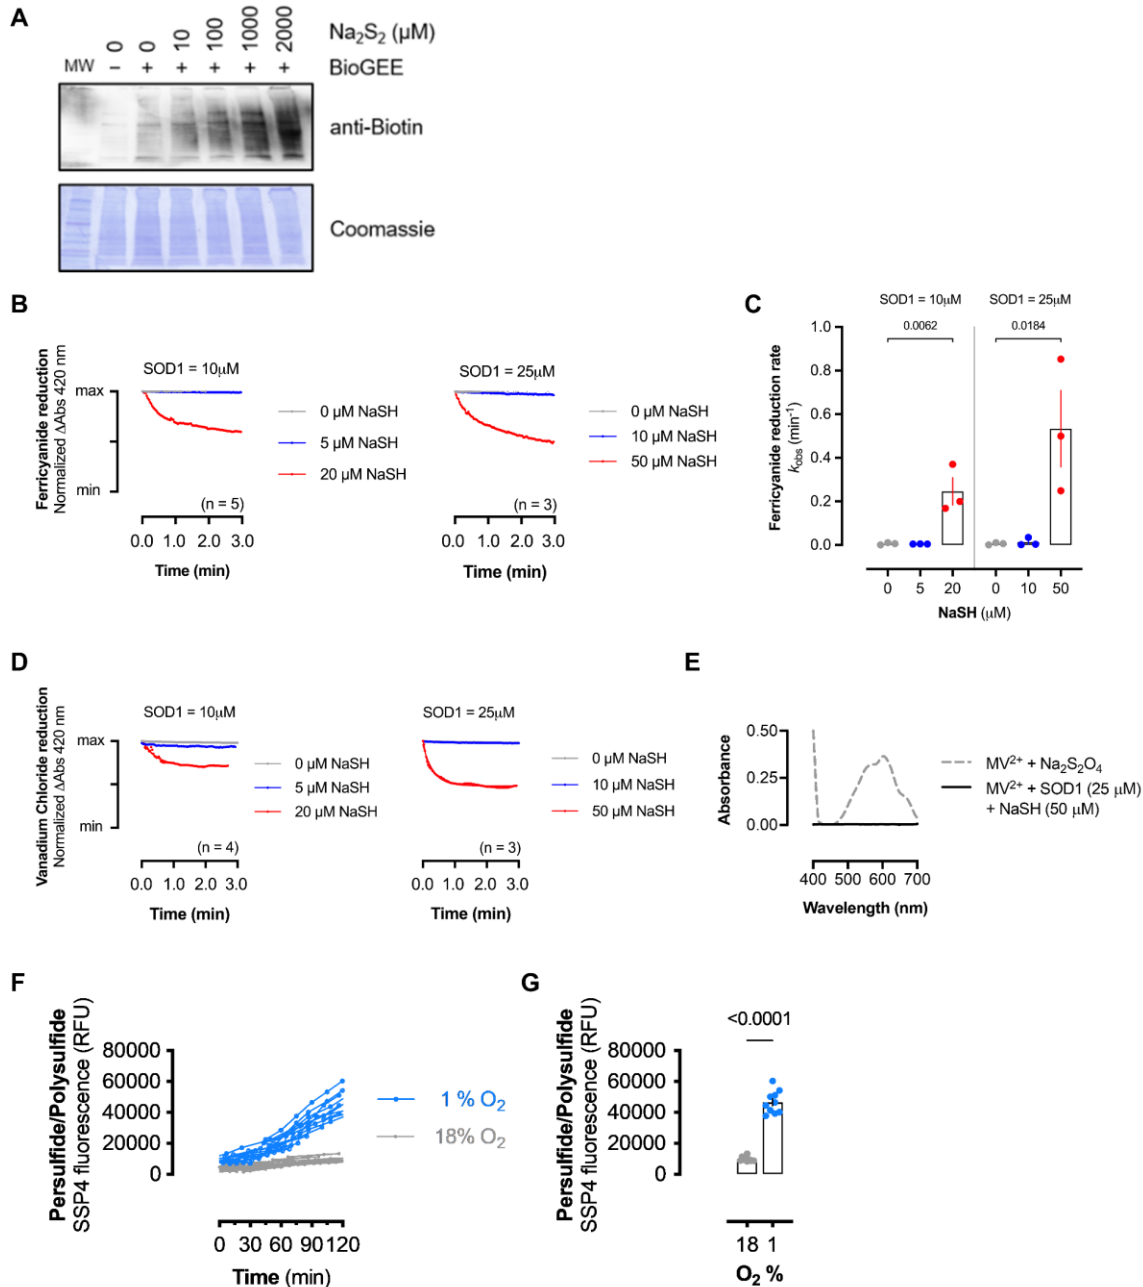

**Fig. S3. SOD1-persulfide complex is a potent reducing agent.**

(A) Representative immunoblot and Coomassie-stained membrane showing relative protein S-glutathonylation from MCF10A human breast epithelial cell line treated with Na<sub>2</sub>S<sub>2</sub>. (B) Kinetics of K<sub>3</sub>Fe(CN)<sub>6</sub> reduction by SOD1 reacted with limiting or excess H<sub>2</sub>S under anaerobic conditions. Data shown are from representative reactions (n=3-5 reactions). (C) Observed reaction rate constants calculated from A by nonlinear regression analysis. Rate constants are shown as mean values (±SEM; n=3-5 reactions). Significance was calculated with one-way ANOVA with Dunnett's multiple comparisons test. (D) Kinetics of VCl<sub>3</sub> reduction by SOD1 reacted with limiting or excess H<sub>2</sub>S under anaerobic conditions. Data shown are from representative reactions (n=3-4 reactions). (E) Visible spectra of methyl viologen radical cation (MV<sup>•+</sup>) formed from the reduction of methyl viologen (MV<sup>2+</sup>) by excess Na<sub>2</sub>S<sub>2</sub>O<sub>4</sub> (dashed line) compared to the spectrum of MV<sup>2+</sup> reacted the complexed formed from SOD1 (25 μM) and NaSH (50 μM) (solid line). Spectra recorded at 23°C

in an anaerobic atmosphere. **(F)** Relative intracellular RSS formation measured by SSP4 fluorescence from wild type yeast cultured in either 18% or 1% O<sub>2</sub> atmosphere at 30°C for 120 minutes. Each line represents an individual replicate (n=10). **(G)**. Bar graph showing mean SSP4 fluorescence after 120 minutes of 1% or 18% O<sub>2</sub> (±SEM; n=10 wells). Significance calculated by unpaired, two-tailed t test.

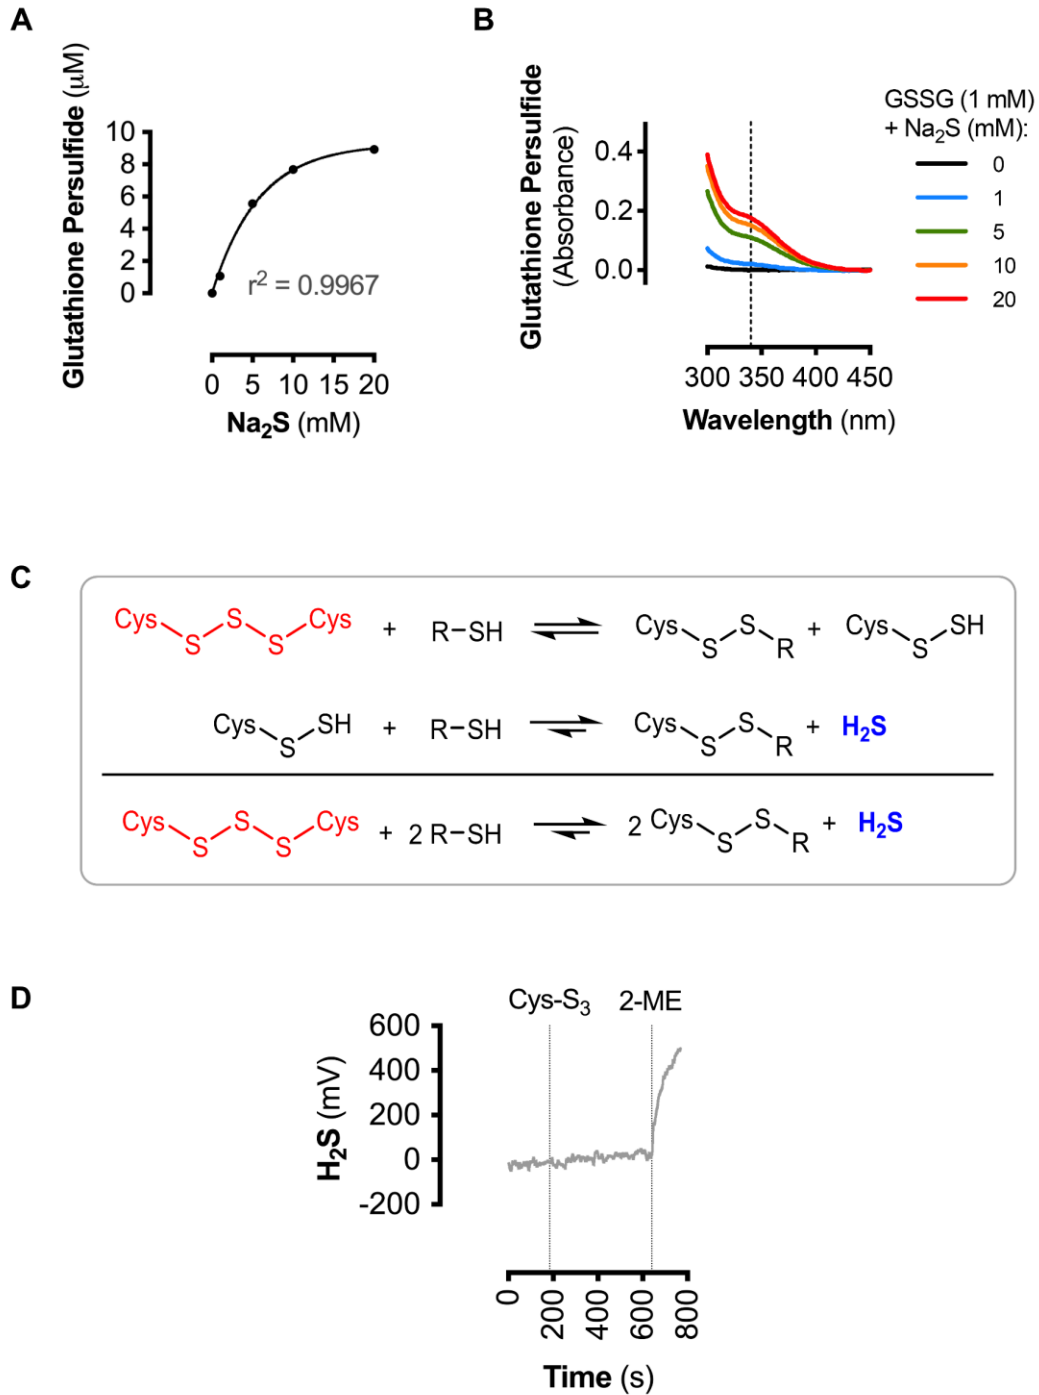

**Fig. S4. SOD1 limits RSS formation.**

(A) Glutathione persulfide formation from the reaction of  $\text{Na}_2\text{S}$  with glutathione disulfide (1 mM) at  $23^\circ\text{C}$ , pH 7.5 (black circles). Data was fit to a one-phase exponential association curve (black line) with  $r^2 = 0.9967$ . (B) UV-visible spectra showing glutathione persulfide formation (340 nm) from  $\text{Na}_2\text{S}$  reacting with GSSG at pH 7.5. (C) Equilibria showing  $\text{H}_2\text{S}$  formation from the reaction of

cysteine trisulfide with thiols, via persulfides intermediates. **(D)** Amperometric electrode measurements of H<sub>2</sub>S formed from the reaction of 100 μM cysteine trisulfide (Cys-S<sub>3</sub>) and 100 μM 2-mercaptoethanol (2-ME).

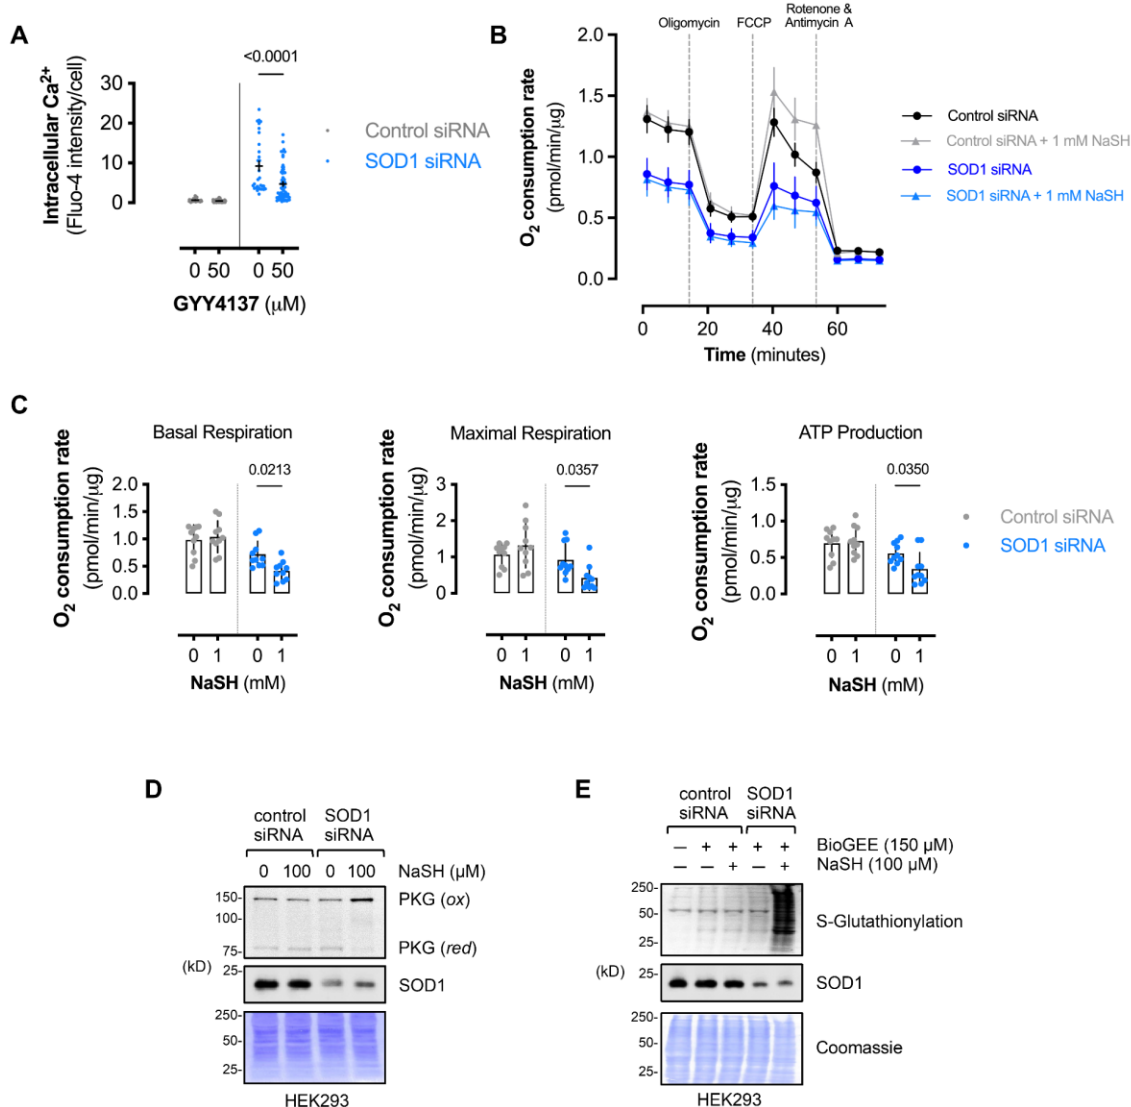

**Fig. S5. SOD1 catalyzed RSS induces cellular thiol oxidation.**

(A) Relative free intracellular calcium levels in control or SOD1-silenced HEK293 cells cultured with GYY4137 (50  $\mu\text{M}$ ) or vehicle. Data shown are fluo-4 fluorescence intensity per cell and black lines represent the mean values ( $\pm\text{SEM}$ ;  $n =$  cells from 3 wells). Significance calculated by two-way ANOVA with Sidak test. (B) Seahorse mitochondrial stress test measuring changes in oxygen consumption rate over time and normalized to protein content of control or SOD1-silenced HEK293 cells treated with vehicle or NaSH and challenged with oligomycin, FCCP, and rotenone/antimycin A. Data represents mean values ( $\pm\text{sd}$ ;  $n=6$  wells) of a representative experiment. (C) Respiration (basal and maximal) and ATP production calculated from Seahorse Mitochondrial Stress Test. Bars represent mean values ( $\pm\text{SEM}$ ;  $n=10$  wells) and significance was calculated by two-way ANOVA with Sidak test. (D) Reduced and oxidized PKG and SOD1 expression from control or SOD1-silenced HEK293 cells treated with 100  $\mu\text{M}$  NaSH. (E) Protein S-glutathionylation and SOD1 expression from control or SOD1-silenced HEK293 cells loaded with BioGEE and treated with 100  $\mu\text{M}$  NaSH.

**Table S1. Multiple reaction monitoring parameters of various persulfide/polysulfide derivatives, used for LC-ESI-MS/MS analyses.**

| Species trapped   | Analyte measured <sup>‡</sup> | Polarity | Precursor ion ( <i>m/z</i> ) | Product ion ( <i>m/z</i> ) | Collision energy (V) |
|-------------------|-------------------------------|----------|------------------------------|----------------------------|----------------------|
| HS <sup>-</sup>   | Bis-S-AM-TME                  | +        | 505.5                        | 136.0                      | 40                   |
|                   | *Bis-S-AM-TME-d4              | +        | 509.5                        | 137.0                      | 40                   |
| HSS <sup>-</sup>  | Bis-SS-AM-TME                 | +        | 537.5                        | 136.0                      | 45                   |
|                   | *Bis-SS-AM-TME-d4             | +        | 541.5                        | 137.0                      | 45                   |
| HSSS <sup>-</sup> | Bis-SSS-AM-TME                | +        | 569.5                        | 136.0                      | 45                   |
|                   | *Bis-SSS-AM-TME-d4            | +        | 573.5                        | 137.0                      | 45                   |
| GSH               | GS-AM-TME                     | +        | 543.2                        | 414.0                      | 20                   |
|                   | *GS-AM-TME-d2                 | +        | 545.2                        | 416.0                      | 20                   |
| GSSH              | GSS-AM-TME                    | +        | 575.5                        | 446.0                      | 20                   |
|                   | *GSS-AM-TME-d2*               | +        | 577.5                        | 448.0                      | 20                   |

\*Stable isotope-labeled standards.

<sup>‡</sup>Chemical structures of analytes:

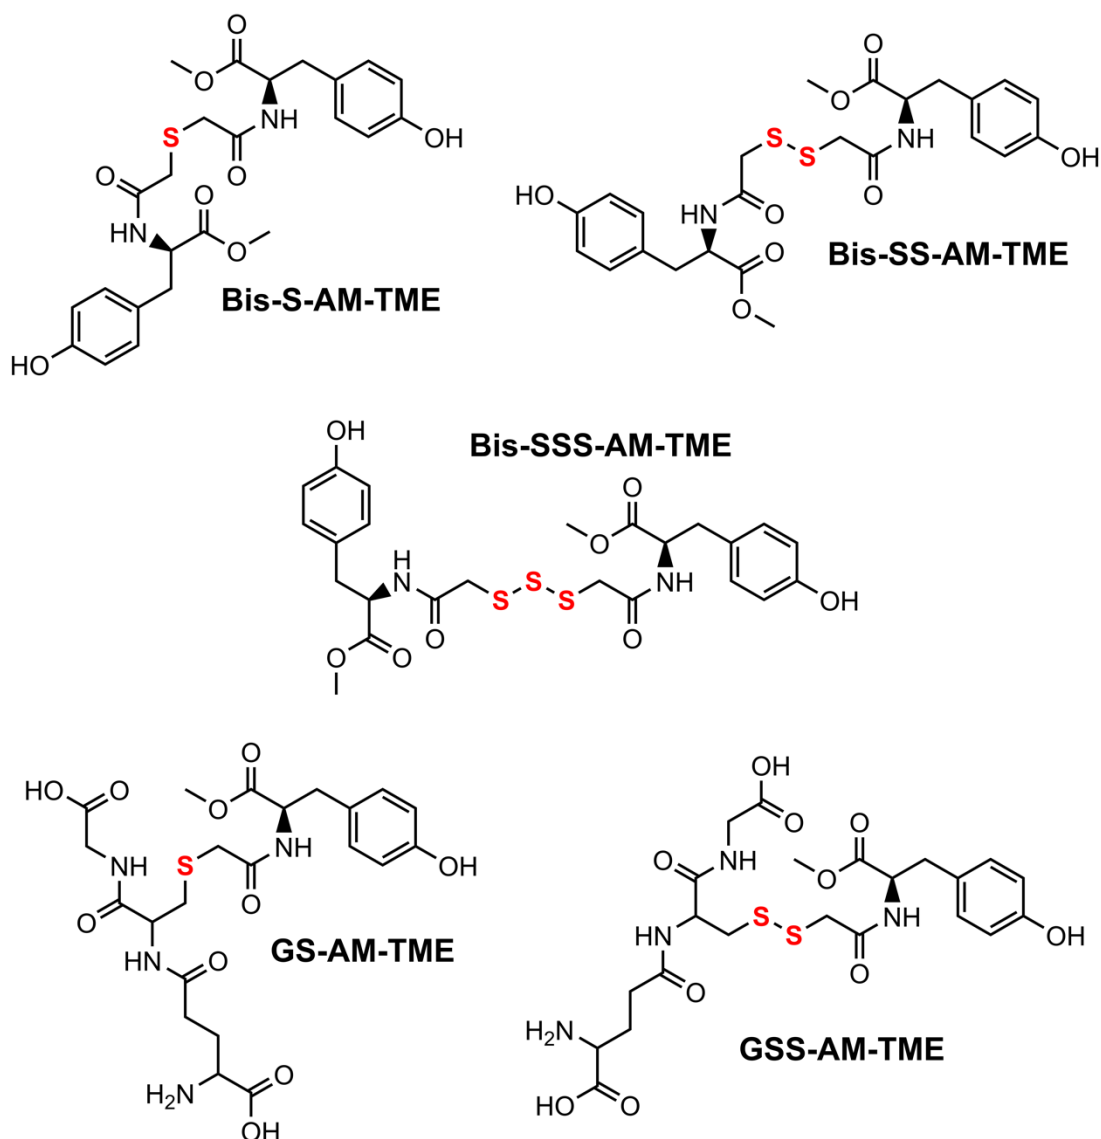

**Table S2. Reagents and resources list.**

| REAGENT or RESOURCE                                                                     | SOURCE                    | IDENTIFIER                       |
|-----------------------------------------------------------------------------------------|---------------------------|----------------------------------|
| Antibodies                                                                              |                           |                                  |
| $\alpha/\beta$ -Tubulin                                                                 | Cell Signaling Technology | RRID:AB_2288042                  |
| Anti-SOD1                                                                               | Cell Signaling Technology | RRID:AB_2302392                  |
| Anti-GFP                                                                                | Cell Signaling Technology | RRID:AB_1196614                  |
| Anti-rabbit IgG, HRP-linked                                                             | Cell Signaling Technology | RRID:AB_2099233                  |
| Anti-mouse IgG, HRP-linked                                                              | Cell Signaling Technology | RRID:AB_330924                   |
| Anti- $\beta$ -Actin                                                                    | Sigma-Aldrich             | RRID:AB_476743                   |
| Anti-biotin (D5A7)                                                                      | Cell Signaling Technology | Cat#5597                         |
| Goat anti-Mouse IgG (H+L), Superclonal™ Recombinant Secondary Antibody, Alexa Fluor 647 | Invitrogen                | Cat#A28181, RRID:AB_2536165      |
| PKG Polyclonal Antibody                                                                 | Enzo Life Sciences        | Cat# KAP-PK005D, RRID:AB_2170659 |
| Chemicals, Peptides, and Recombinant Proteins                                           |                           |                                  |
| Superoxide Dismutase from bovine erythrocytes                                           | Sigma-Aldrich             | Cat# S7571                       |
| Superoxide Dismutase from human erythrocytes                                            | Sigma-Aldrich             | Cat# S9636                       |
| Sodium hydrosulfide                                                                     | Sigma-Aldrich             | Cat# 161527                      |
| Sodium sulfide                                                                          | Sigma-Aldrich             | Cat# 407410                      |
| Sodium disulfide                                                                        | Dojindo                   | Cat# SB02                        |
| Difluorinated H <sub>2</sub> S Fluorescent Probe 1                                      | Cayman Chemical           | Cat# 29835                       |
| L-Glutathione reduced                                                                   | Sigma-Aldrich             | Cat# G4251                       |
| GY4137 Dichloromethane complex                                                          | Sigma-Aldrich             | Cat# SML0100                     |
| Geneticin™ Selective Antibiotic (G418 Sulfate), Powder                                  | ThermoFisher Scientific   | Cat# 11811023                    |
| Manganese diacetate                                                                     | Sigma-Aldrich             | Cat# 330825                      |
| Methyl viologen dichloride hydrate                                                      | Sigma-Aldrich             | Cat# 856177                      |
| SSP4                                                                                    | Dojindo                   | Cat# SB10                        |
| Glutathione Ethyl Ester, Biotin Amide (BioGEE)                                          | Invitrogen                | Cat# G36000                      |
| Iron(III) chloride                                                                      | Sigma-Aldrich             | Cat# 157740                      |
| Potassium superoxide                                                                    | Sigma-Aldrich             |                                  |
| Cysteine trisulfide, > 90% purity                                                       | Prof Jon Fukuto           | SI Ref. (5)                      |
| 2-mercaptoethanol                                                                       | Sigma-Aldrich             | Cat# M6250                       |
| Potassium polysulfide                                                                   | Sigma-Aldrich             | Cat# 12665                       |
| rotenone                                                                                | Sigma-Aldrich             | Cat# R8875                       |



|                                                                   |                         |                 |
|-------------------------------------------------------------------|-------------------------|-----------------|
| Vanadium(III) chloride                                            | Thermo Scientific Acros | Cat# 197000250  |
| Sodium dithionite                                                 | Sigma-Aldrich           | Cat# 157953     |
| Bovine Serum Albumin                                              | Tocris                  | Cat# 5217       |
| UltraPure™ 0.5M EDTA, pH 8.0                                      | Invitrogen              | Cat# 15575020   |
| Yeast Extract                                                     | Gibco                   | Cat# 211929     |
| Peptone                                                           | Gibco                   | Cat# BP1420-500 |
| DPBS, no calcium, no magnesium                                    | Gibco                   | Cat# 14190144   |
| Trypsin-EDTA (0.25%), phenol red                                  | Gibco                   | Cat# 25200056   |
| Penicillin-Streptomycin (10,000 U/mL)                             | Gibco                   | Cat# 15140      |
| DMEM, high glucose, GlutaMAX™ Supplement, pyruvate                | Gibco                   | Cat# 31966021   |
| Fetal Bovine serum                                                | PAN BIOTECH             | Cat# P40-39500  |
| Lipofectamine™ 3000 Transfection Reagent                          | Invitrogen              | Cat# L3000008   |
| L-Glutathione oxidized                                            | Sigma-Aldrich           | Cat# G4376      |
| NucBlue™ Live ReadyProbes™ Reagent                                | Invitrogen              | Cat# R37605     |
| B-(2-oxo-2H-1-benzopyran-7-yl)-boronic acid (CBA)                 | Cayman Chemical         | Cat# 14051      |
| Copper(II) sulfate pentahydrate                                   | Thermo Scientific       | Cat#197720010   |
| Zinc nitrate hexahydrate                                          | Sigma-Aldrich           | Cat#228737      |
| Water for Ion Chromatography                                      | Fisher Chemical         | Cat#12993634    |
| Nitric Acid (TraceMetal™ Grade)                                   | Fisher Chemical         | Cat#A509-P212   |
| Defined Trypsin Inhibitor                                         | Gibco                   | Cat#R007100     |
| MEGM™ Mammary Epithelial Cell Growth Medium BulletKit™            | Lonza                   | Cat#CC-3150     |
| Cholera Toxin from <i>Vibrio cholerae</i>                         | Sigma-Aldrich           | Cat#C8052       |
| Critical Commercial Assays                                        |                         |                 |
| GSH-Glo™ Glutathione Assay                                        | Promega                 | Cat# V6911      |
| Complex IV Human Enzyme Activity Microplate Assay Kit             | Abcam                   | Cat# ab109909   |
| Superoxide Dismutase Activity Assay Kit (Colorimetric)            | Abcam                   | Cat#ab65354     |
| MitoSOX Red                                                       | Invitrogen              | Cat# M36008     |
| CellTiter 96® AQueous One Solution Cell Proliferation Assay (MTS) | Promega                 | Cat# G3582      |
| Amersham ECL Prime Western Blotting Detection Reagent             | Cytiva                  | Cat# RPN2232768 |
| Experimental Models: Cell Lines                                   |                         |                 |
| HEK293 cell line                                                  | ATCC                    | RRID:CVCL_0045  |
| MCF10A cell line                                                  | ATCC                    | RRID:CVCL_0598  |
| Experimental Models: Organisms/Strains                            |                         |                 |

|                                                                      |                         |                                                                                                                               |
|----------------------------------------------------------------------|-------------------------|-------------------------------------------------------------------------------------------------------------------------------|
| yeast: <i>sod1Δ</i> : MATa his3Δ1 leu2Δ0 met15Δ0 ura3Δ0 <i>sod1Δ</i> | Horizon                 | Cat#YSC6273-201937842                                                                                                         |
| yeast: wild type: MATa his3Δ1 leu2Δ0 met15Δ0 ura3Δ0                  | Horizon                 | Cat#YSC1048                                                                                                                   |
| Oligonucleotides                                                     |                         |                                                                                                                               |
| siRNA targeting sequence: SOD1<br>Fw: GGUGGUCCAUGAAAAAGCATT          | ThermoFisher Scientific | Cat#4390824; siRNA ID s451                                                                                                    |
| siRNA targeting sequence: SOD1<br>Rev: UGCUUUUUCAUGGACCACCAG         | ThermoFisher Scientific | Cat#4390824; siRNA ID s451                                                                                                    |
| siRNA targeting sequence: SOD2<br>Fw: UGUCAGGCCUGAUUAUCUATT          | ThermoFisher Scientific | Cat#4390824; siRNA ID s13268                                                                                                  |
| siRNA targeting sequence: SOD2<br>Rev: UAGAUAAUCAGGCCUGACATT         | ThermoFisher Scientific | Cat#4390824; siRNA ID s13268                                                                                                  |
| <i>Silencer™</i> Select Negative Control No. 1 siRNA                 | ThermoFisher Scientific | Cat#4390843                                                                                                                   |
| Recombinant DNA                                                      |                         |                                                                                                                               |
| CBS-GFP (WT)                                                         | this manuscript         | Addgene; Plasmid ID 182923                                                                                                    |
| CBS-GFP (H65R)                                                       | this manuscript         | Addgene; Plasmid ID 182923                                                                                                    |
| pcDNA3.1-hSOD1-FLAG                                                  | this manuscript         | Addgene; Plasmid ID 182922                                                                                                    |
| Software and Algorithms                                              |                         |                                                                                                                               |
| GelPro Analyzer 3.1                                                  | Media Cybernetics       | <a href="https://www.mediacy.com/">https://www.mediacy.com/</a>                                                               |
| Prism9                                                               | Graphpad                | <a href="https://www.graphpad.com/">https://www.graphpad.com/</a>                                                             |
| LabChart8                                                            | ADInstruments           | <a href="https://www.adinstruments.com/">https://www.adinstruments.com/</a>                                                   |
| RTCA Software Pro                                                    | Agilent                 | <a href="https://www.agilent.com/">https://www.agilent.com/</a>                                                               |
| MARS Data Analysis Software 3.31                                     | BMG LABTECH             | <a href="https://www.bmg-labtech.com/microplate-reader-software/">https://www.bmg-labtech.com/microplate-reader-software/</a> |

## SI References

1. R. L. McNaughton *et al.*, Probing in vivo Mn<sup>2+</sup> speciation and oxidative stress resistance in yeast cells with electron-nuclear double resonance spectroscopy. *Proc Natl Acad Sci U S A* **107**, 15335-15339 (2010).
2. X. Gu, Y. Ma, Y. Liu, Q. Wan, Measurement of mitochondrial respiration in adherent cells by Seahorse XF96 Cell Mito Stress Test. *STAR Protocols* **2**, 100245 (2021).
3. S. Kasamatsu *et al.*, High-Precision Sulfur Metabolomics Innovated by a New Specific Probe for Trapping Reactive Sulfur Species. *Antioxid Redox Signal* **34**, 1407-1419 (2021).
4. D. M. Miller-Martini, S. Hua, P. M. Horowitz, Cysteine 254 can cooperate with active site cysteine 247 in reactivation of 5,5'-dithiobis(2-nitrobenzoic acid)-inactivated rhodanese as determined by site-directed mutagenesis. *Journal of Biological Chemistry* **269**, 12414-12418 (1994).
5. C. H. Switzer, S. Gutzzeit, T. R. Eykyn, P. Eaton, Cysteine trisulfide oxidizes protein thiols and induces electrophilic stress in human cells. *Redox Biology* **47**, 102155 (2021).
